# Supplementary material
Source: publisher figshare collection journal article supplement (https://gsajournals.figshare.com/ndownloader/files/22722734)
Supplement: Supplementary file 1 [file 22722734]

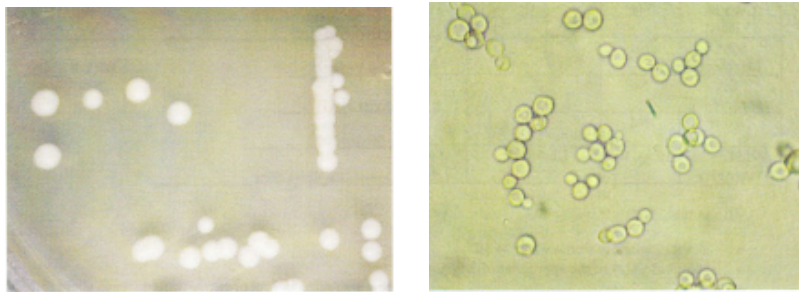

**Figure S1. Colonies and cells of the Jean-Talon strain.** On the left picture, colonies on YPD medium, after 48 h incubation at 30°. On the right picture yeast cells in YPD, after 16 h incubation at 28°, 175 rpm, observed at 40X.
